# Supplementary material for: Financial Incentives to Increase Colorectal Cancer Screening Uptake and Decrease Disparities: A Randomized Clinical Trial
Source: PubMed Central journal article supplement (PMC6789432; doi:10.1001/jamanetworkopen.2019.6570), 2019-07-03
Supplement: NIHMS1047899-supplement-Supplement_3.pdf [file NIHMS1047899-supplement-Supplement_3.pdf]

## Data Sharing Statement

Green. Financial Incentives to Increase Colorectal Cancer Screening Uptake and Decrease Disparities. *JAMA Netw Open*. Published July 05, 2019. 10.1001/jamanetworkopen.2019.6570

### Data

**Data available:** Yes

**Data types:** Deidentified participant data, Data dictionary

**How to access data:** By request to [Bev.B.Green@kp.org](mailto:Bev.B.Green@kp.org)

**When available:** With publication

### Supporting Documents

**Document types:** None

### Additional Information

**Who can access the data:** Researchers whose proposed use of the data has been approved

**Types of analyses:** De-identified participant data, Data dictionary

**Mechanisms of data availability:** Without investigator support

**Any additional restrictions:** Data cannot be used to attempt to re-identify any sites or patients and contact them in any manner.
